# Supplementary material for: Histone Methyltransferase SsDim5 Regulates Fungal Virulence through H3K9 Trimethylation in Sclerotinia sclerotiorum
Source: MDPI journal article supplement (doi:10.3390/jof10040271), 2024-04-06
Supplement: s1 [file s1]

## Supplementary Figures

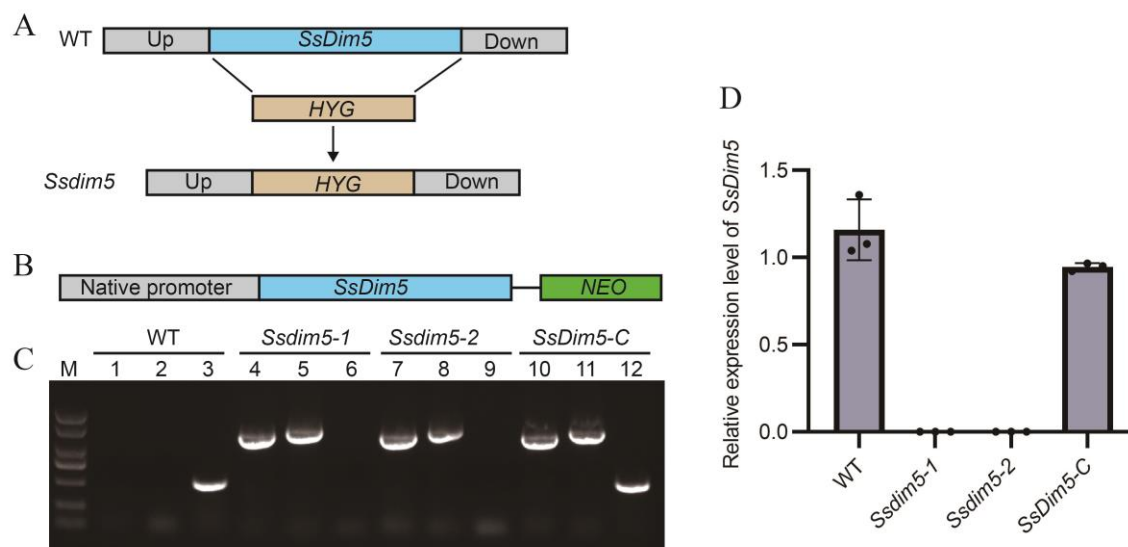

**Supplementary Figure 1.** Identification of *SsDim5* knockout mutants and genetically complemented strains. (A) Schematic diagram of the *SsDim5* knockout method. (B) Schematic diagram of the *SsDim5* complementation method. (C) PCR verification. Primers Dim5-up-check-F/hyg-check-R amplify the upstream flanking sequence of the *SsDim5* gene and part of the TrpC promoter fusion fragment (lanes 1, 4, 7 and 10), and primer hyg-check-F/Dim5-down-check-R amplifies The downstream flanking sequence of the *SsDim5* gene and a part of the TrpC-terminator fusion fragment (lanes 2, 5, 8 and 11), and the primer Dim5-F/Dim5-R amplified the *SsDim5* genomic fragment (lanes 3, 6, 9 and 12). (D) Quantitative real-time PCR detection of *SsDim5* transcripts in WT, *Ssdim5-1/Ssdim5-2*, and *SsDim5-C*. Utilizing *SsTubulin1* as the reference gene, average values and standard deviations were computed based on data from three independent biological replicates.

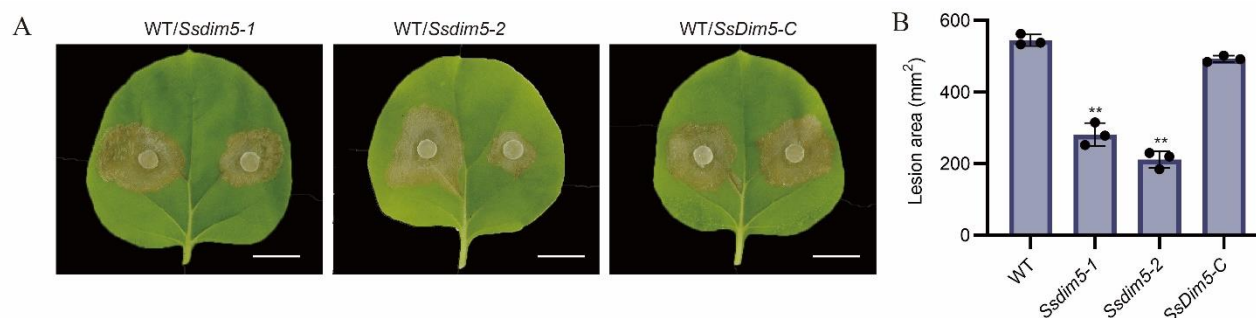

**Supplementary Figure 2.** Pathogenicity assays of individual strains in *N. benthamiana* leaves. (A) Disease phenotype of WT, *Ssdim5-1*, *Ssdim5-2* and *SsDim5-C* of *N. benthamiana* leaves. Bar = 1cm. Photographs were taken at 24 hpi. One representative biological replicate was shown. (B) Statistical analysis of the lesion area in panels. WT, *Ssdim5-1*, *Ssdim5-2* and *SsDim5-C*. Average values and standard deviations were computed based on data from three independent biological replicates. Differences were evaluated using the one-way ANOVA test. \* denotes  $P < 0.05$ , \*\* denotes  $P < 0.01$ .

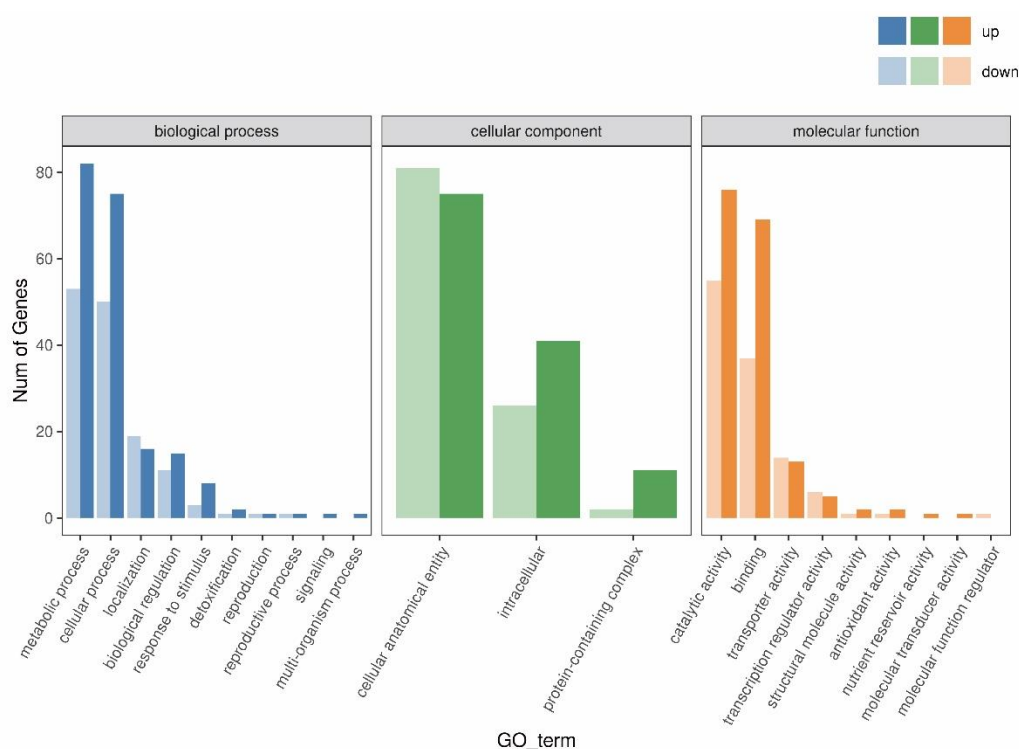

**Supplementary Figure 3.** GO enrichment analysis of differentially expressed genes in *SsDim5* mutants.

## Supplementary Tables

**Table S1:** Primers used in the experiment

|                 |                             |
|-----------------|-----------------------------|
| Dim5-up-F       | TCTTCTTCGCACCTGCCTTC        |
| Dim5-up-R       | AATGGGTTGAATAAGTATCCAG      |
| Dim5-down-F     | TACGCGCAAGGATGATCTAT        |
| Dim5-down-R     | CCAAC TTTCTAGCGAGTCAA       |
| Dim-F           | TGGTGCCAAATTCGCAGCTT        |
| Dim-R           | TATTAGGTTTCGCAGGAGTGA       |
| Dim5-up-check-F | TACGCTGCGCATCCGACCCC        |
| Dim5-up-check-R | TGTGGCGTCGTCTTTGTTGA        |
| HYG-F           | AGAAGATGATATTGAAGGAGCAC     |
| HY-R            | GCATCATCGAAATTGCCGTCAACC    |
| YG-F            | TCTCGGAGGGCGAAGAATCTCGTGC   |
| HYG-R           | AAAGAAGGATTACCTCTAAACAAGTGT |
| HY-CHECK-R      | TCATTGTTGACCTCCACTA         |
| YG-CHECK-R      | TACAGGACACACATTCATCG        |
| Dim5-Com-F      | TCTCGTCACAAGCGCAAGCT        |
| Dim5-Com-R      | TCTCAATTCTCAGCTTTCGA        |
| SsTublin1-RT-F  | CGATGAAGCTCAATCCAAACGA      |
| SsTublin1-RT-R  | CAGAGTCGAGCACAATACCG        |
| SsDim5-RT-F     | TCTAACTCTCCCTGGTGATT        |
| SsDim5-RT-R     | TCCTTCACTATTACCACCTG        |

|                 |                     |
|-----------------|---------------------|
| SS1G_02251-RT-F | TTACGATTATTACCACGA  |
| SS1G_02251-RT-R | GAACATCACTTTCCTTTG  |
| SS1G_07229-RT-F | GTCAGTCTTTTCGTCGTT  |
| SS1G_07229-RT-R | TCATTGGCACCACCTATTT |
| SS1G_13355-RT-F | gcattgggaaaggatagtc |
| SS1G_13355-RT-R | catcgtcgtgattgtggtc |
| SS1G_13358-RT-F | atctcgccatacttcttc  |
| SS1G_13358-RT-R | agtccttctcccaaaatc  |
| SS1G_13636-RT-F | tacgaaataccgaggaaag |
| SS1G_13636-RT-R | gtaggactatcaggcaccc |
| SS1G_13850-RT-F | TCAAAGGTCCTCCATCCC  |
| SS1G_13850-RT-R | TACGAAAGCCATTCTGCC  |
